# Supplementary material
Source: Springer Nature journal article supplement (https://www.springermedizin.de/resource/supplementary/13046_2011_486_MOESM2_ESM.pdf/9662334)

**PI**

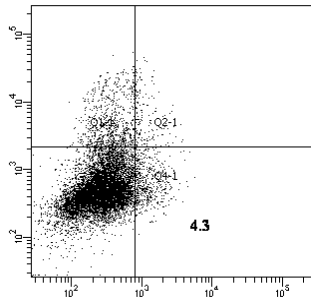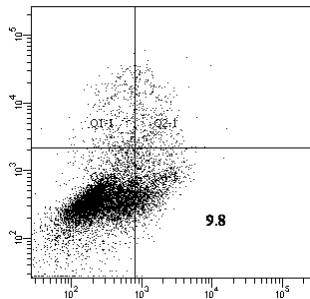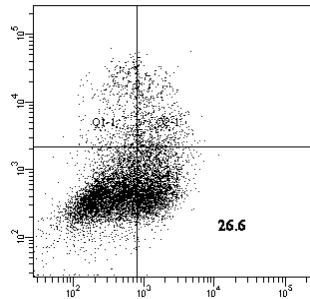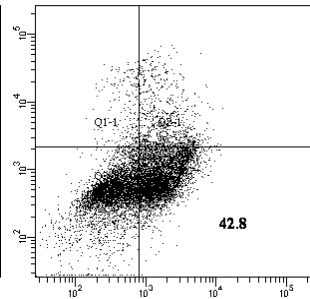

**Annexin V-FITC**

Supplement: MOESM2 [file 9662334]
